# Supplementary material
Source: Frontiers journal article supplement (https://www.frontiersin.org/articles/350637)

**Additional file 1.** Phylogenetic tree of extant squamate species used in this study, adapted from the most inclusive and recent studies on squamate evolution, and rooted using Sphenodontidae (tuatara). See Additional file 2 for a complete list of species.

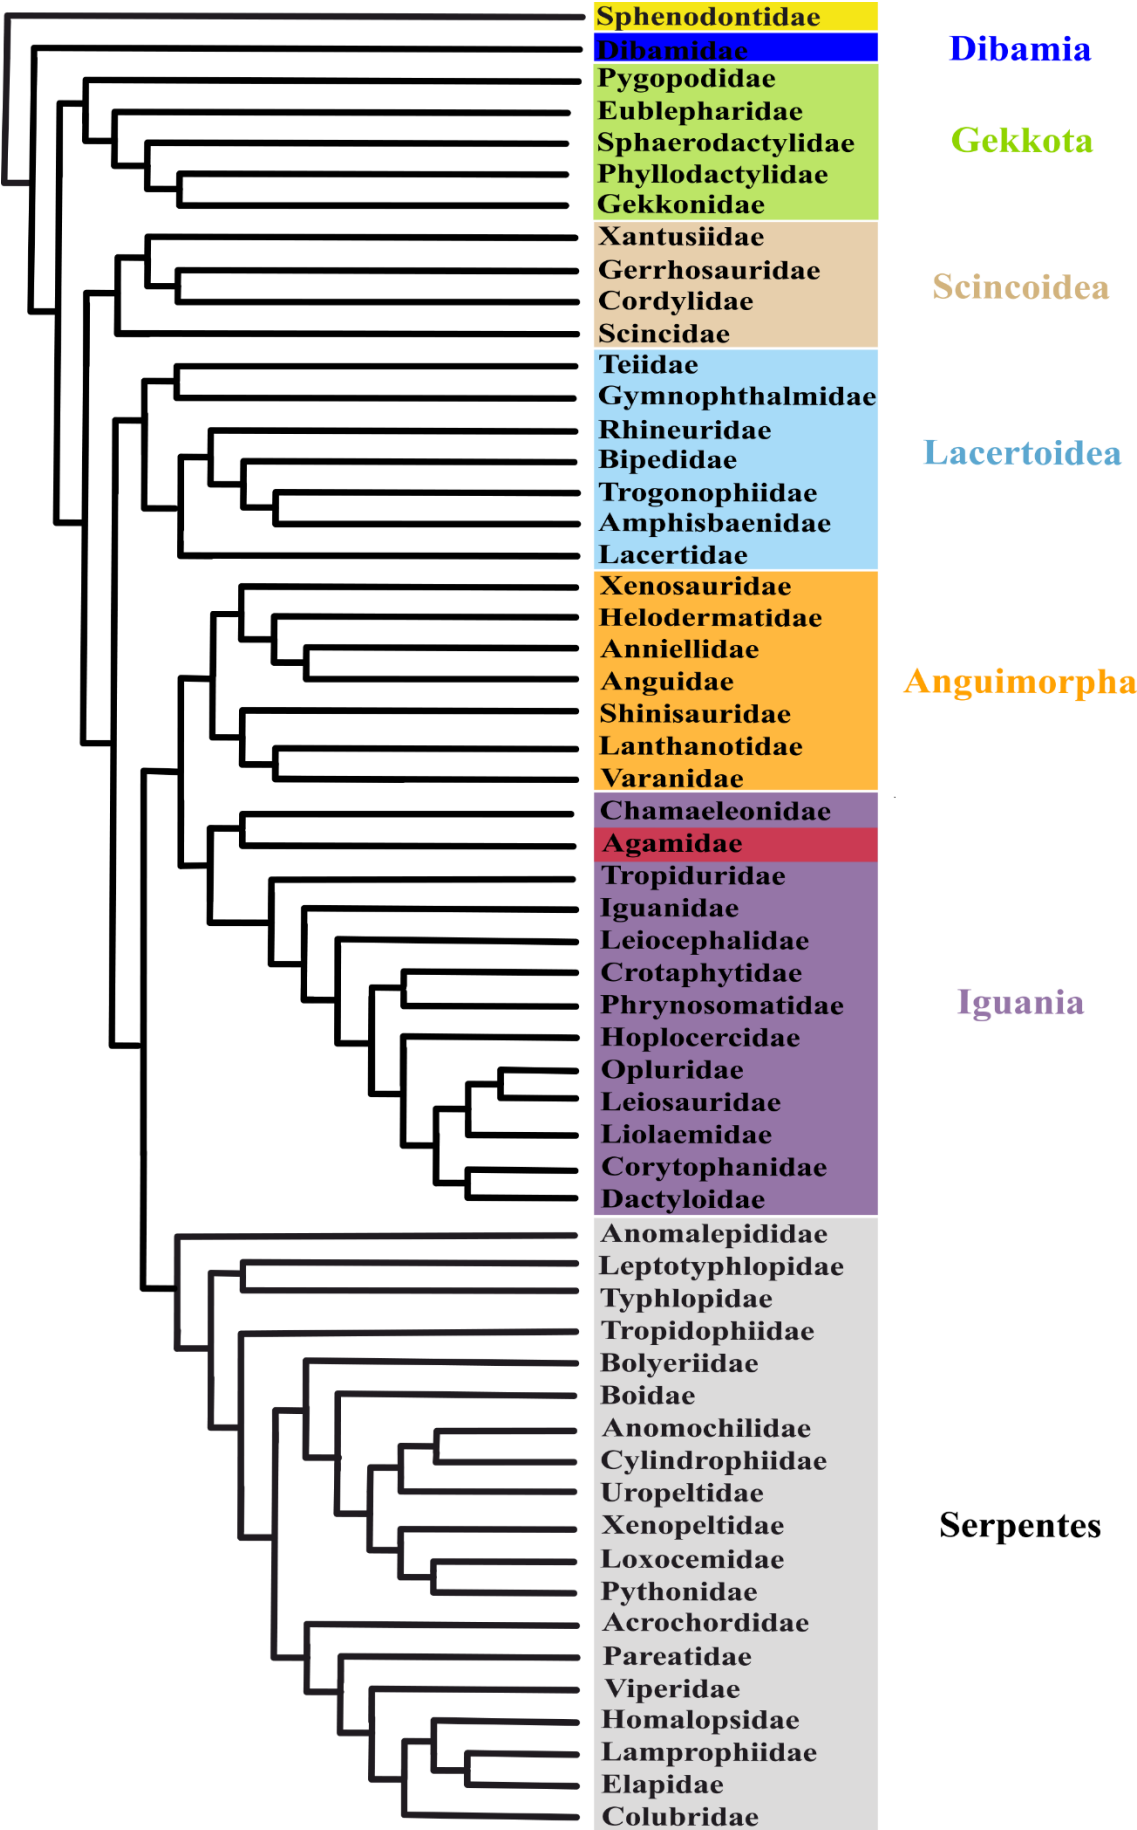

Supplement: Data_Sheet_1.PDF [file Data_Sheet_1.PDF]
