# Supplementary material
Source: Frontiers journal article supplement (https://www.frontiersin.org/articles/350637)

**Additional file 5.** (A,B) 3D landmark points on the skull of the snake *Python bivittatus* in lateral (A), ventral (B, top panel), and dorsal (B, bottom panel) views. (C) Skull of the snake *Python bivittatus* in anterior (left panel) and posterior (right panel) views. See Additional file 6 for a complete list of landmarks.

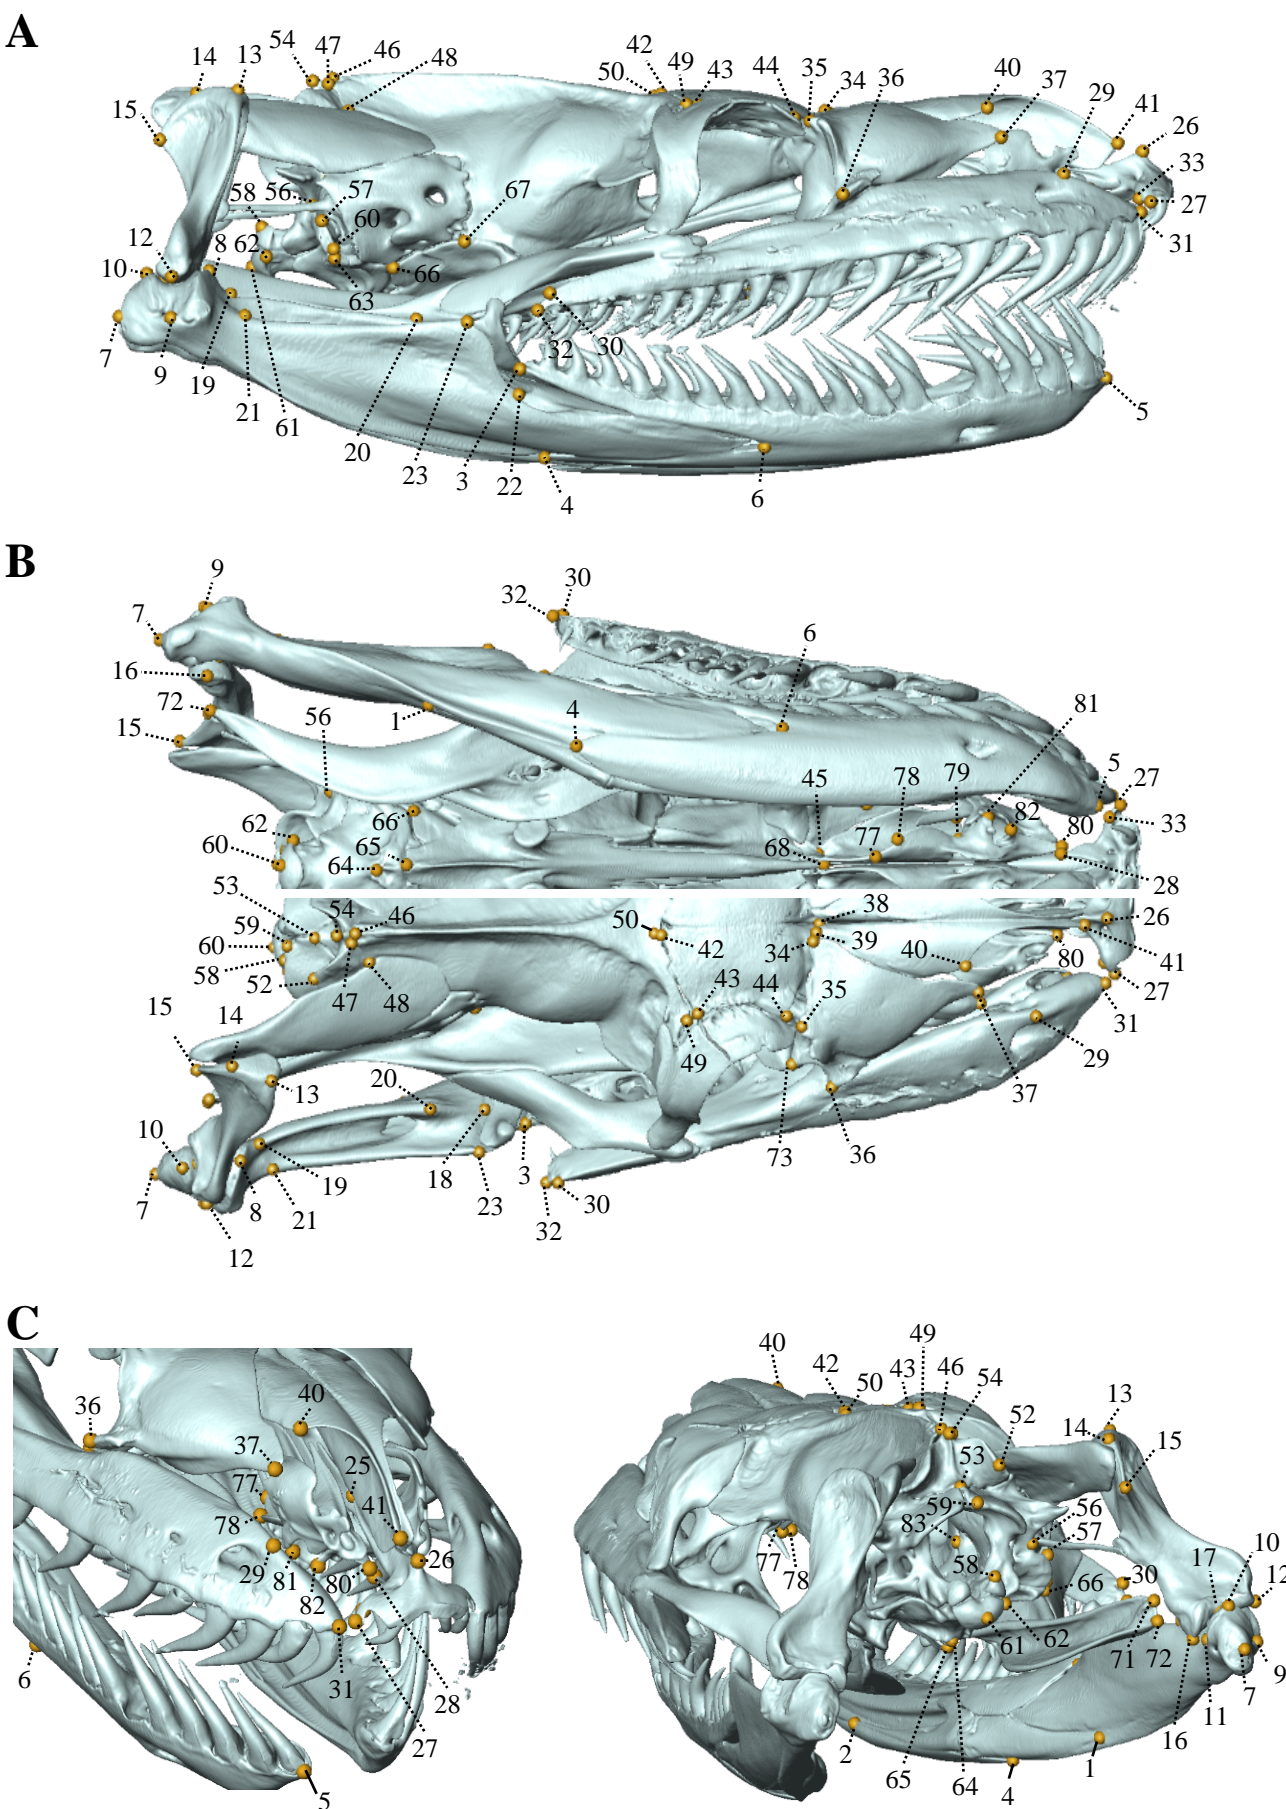

Supplement: Data_Sheet_5.PDF [file Data_Sheet_5.PDF]
